# Supplementary material
Source: PubMed Central journal article supplement (PMC1851077)

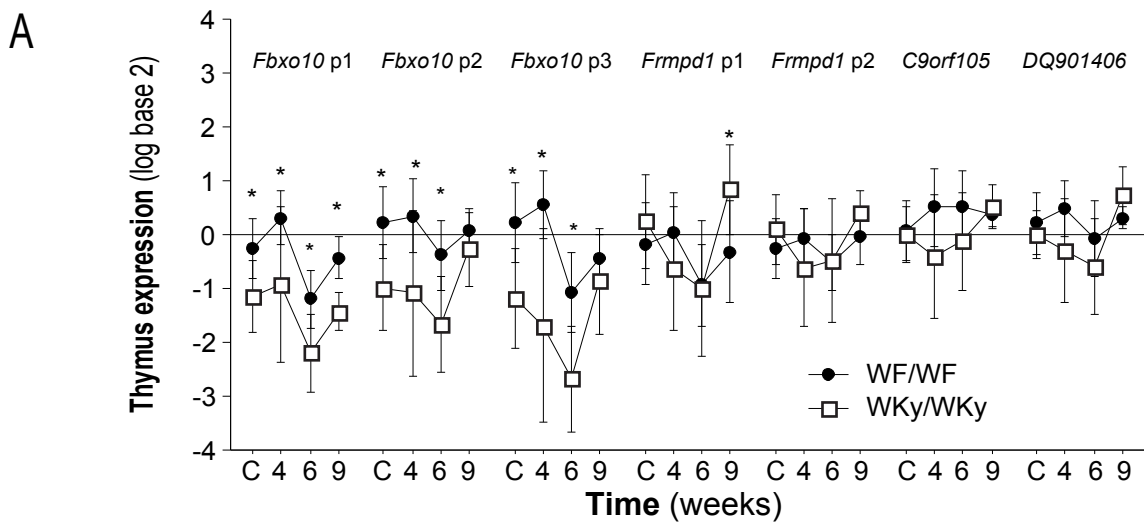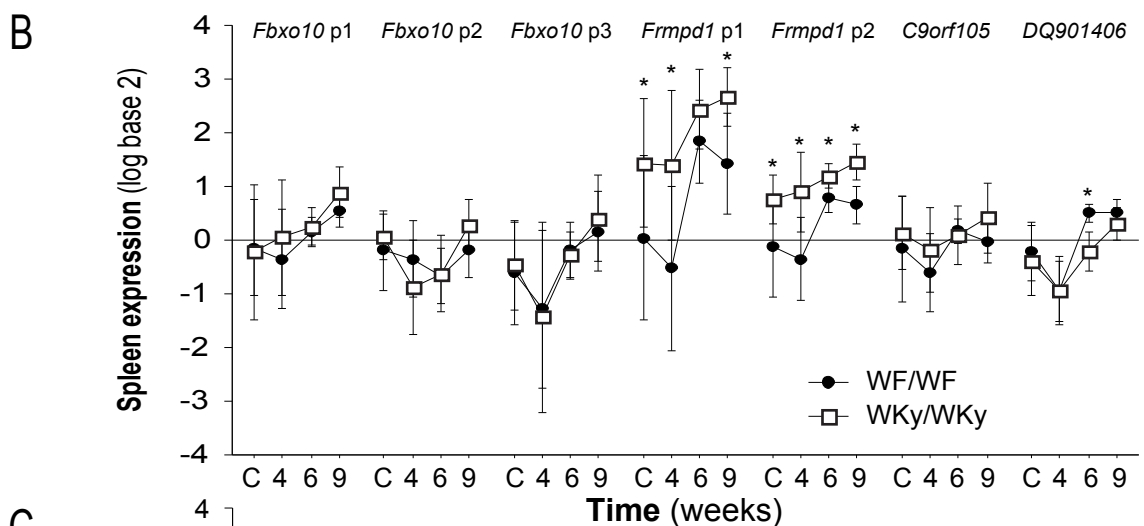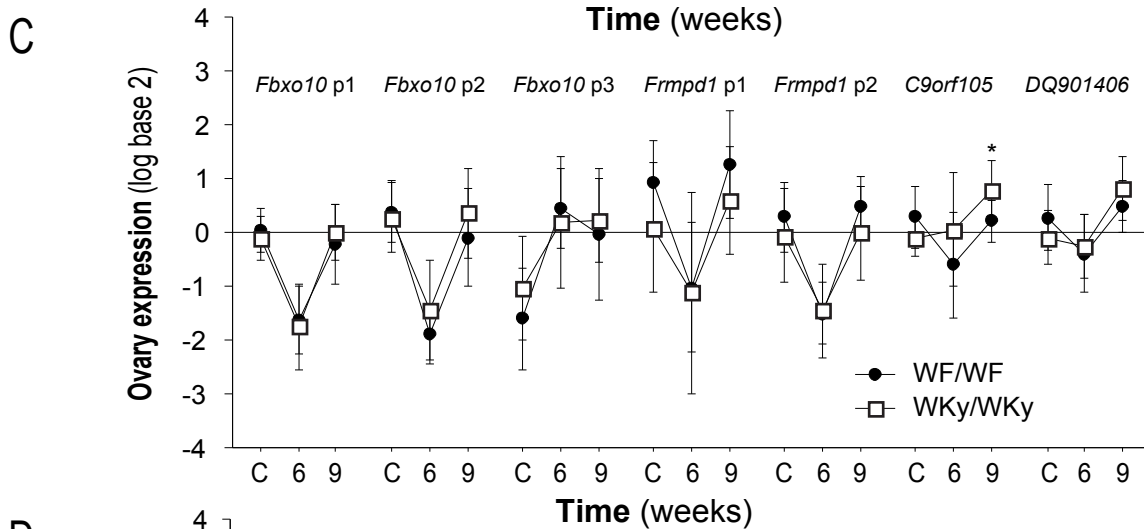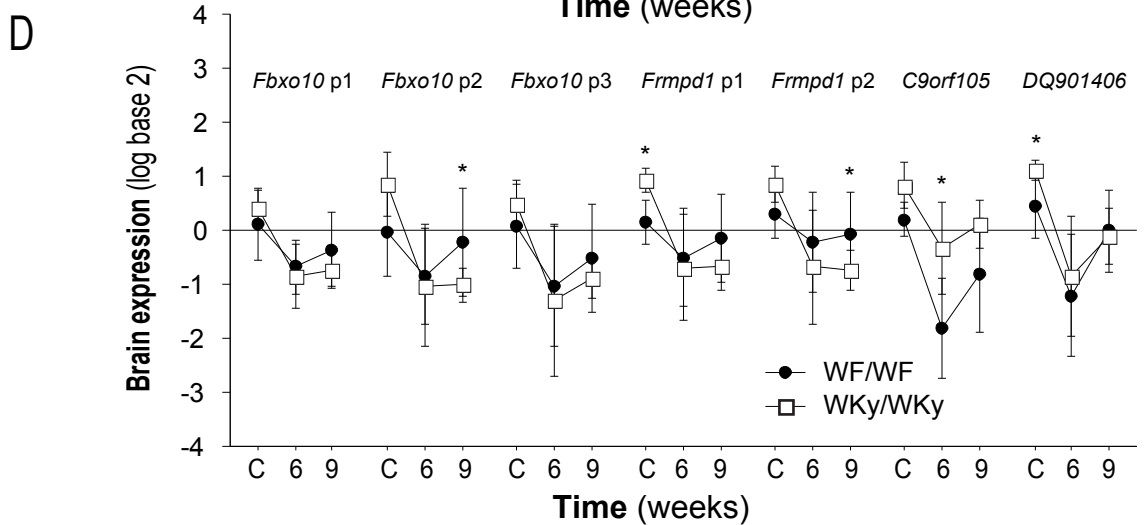

Supplement: pnas_0701687104_2.pdf [file pnas_0701687104_2.pdf]
